# Supplementary material
Source: Springer Nature journal article supplement (https://www.springermedizin.de/resource/supplementary/13014_2011_565_MOESM7_ESM.pdf/9634132)

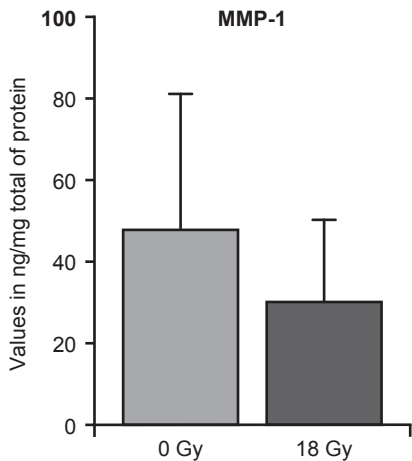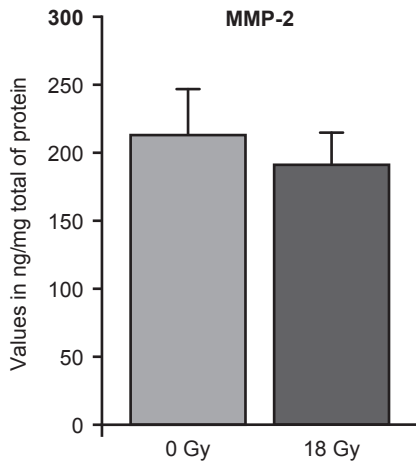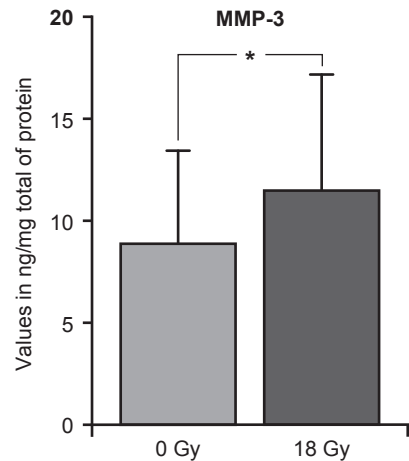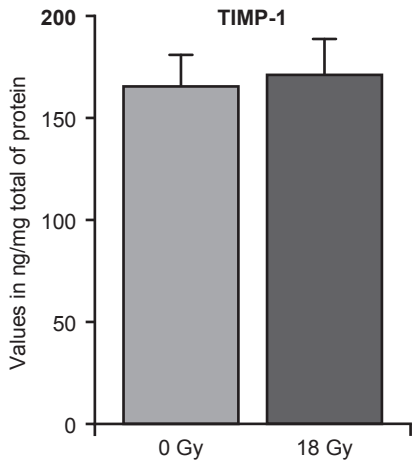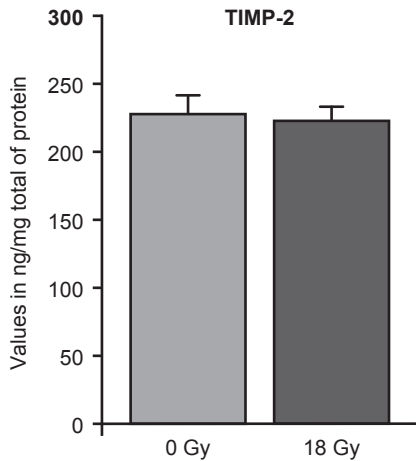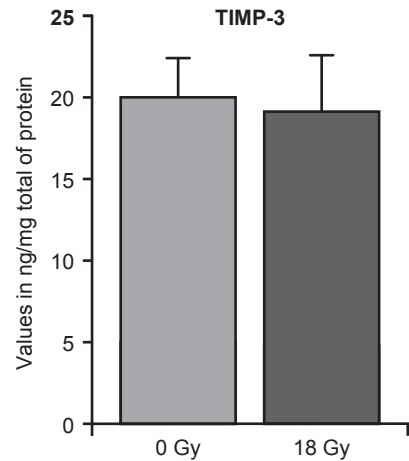

Supplement: MOESM7 [file 9634132]
